# Supplementary material for: Serological Biomarkers for Early Detection of Hepatocellular Carcinoma: A Focus on Autoantibodies against Tumor-Associated Antigens Encoded by Cancer Driver Genes
Source: MDPI journal article supplement (doi:10.3390/cancers12051271), 2020-05-18
Supplement: s1 [file s1]

# Supplementary Materials: Serological Biomarkers for Early Detection of Hepatocellular Carcinoma: A Focus on Autoantibodies against Tumor-Associated Antigens Encoded by Cancer Driver Genes

|             |        |           |        |              |             |             |             |          |        |
|-------------|--------|-----------|--------|--------------|-------------|-------------|-------------|----------|--------|
| PTPN11      | KRAS   | NRAS      | CCND1  | PBRM1 (frag) | IKZF1       | Survivin    | PHF6        | IMP2/p62 | FUBP1  |
| NFE2L2      | IMP1   | U2AF1     | ATRX   | HRAS         | AKT1        | Survivin    | MYCL1       | IMP3/Koc | NPM1   |
| KLF4        | H3F3A  | IDH2      | GATA3  | TP53         | GNAS        | NF2         | SMAD2       | MEN1     | GATA1  |
| PPP2R1A     | WT1    | PTCH1     | DNMT3A | Ra1A         | GATA3       | PIK3R1      | SMAD4       | B2M      | CTNNB1 |
| SMARCB1     | GNAQ   | FGFR2     | BAP1   | SMO          | TRAF7       | SOX9        | RET         | GNAS     | ACVR1B |
| SETBP1      | MDM4   | ASXL1     | NF2    | CASP8        | PAX5        | MPL         | FBXW7       | DAXX     | PIK3R1 |
| TET2 (frag) | SKP2   | DNMT3A    | MDM2   | KRAS         | PRDM1       | FOX12       | MAP2K4      | MDM2     | STAG2  |
| GATA2       | MYCN   | BRCA1     | MLH1   | BCL2         | ATM         | CDC73       | VHL         | CDKN2C   | GATA1  |
| CBL         | HRAS   | CDH1      | EGFR   | PDGFRA       | SRSF2       | PTEN        | MDM2        | SF3B1    | LMO1   |
| BCOR        | GNA11  | PTEN      | SRSF2  | PRDM1        | EGFR        | IDH1        | TNFAIP3     | YWHAZ    | KIT    |
| CASP8       | HNF1A  | KLF4      | NCOA3  | KDM5C        | SMARCA4     | EZH2        | RBM39       | PDGFRA   | NPM1   |
| JAK2        | PIK3CA | FGFR2     | FGFR2  | PDGFRA       | RNF43       | KDM6A       | JAK3        | BRAF     | CSF1R  |
| JAK1        | ALK    | CIP2A/p90 | MSH6   | c-Myc        | APC         | HIST1H3B    | SOCS1       | ERBB2    | TSHR   |
| ARID2       | CRLF2  | FGFR3     | TSC1   | MED12        | MET         | CDKN2A      | MSH2        | SPOP     | RUNX1  |
| Cydlin B1   | RB1    | NKX2-1    | PRDM1  | MYD88        | DNMT3A      | PTCH1       | CEBPA       | GNAS     | BRCA2  |
| NCOR1       | GNAS   | EGFR      | ERBB2  | positive3-1  | positive3-2 | positive3-3 | positive3-4 | buffer   | buffer |

**Figure S1.** Layout of recombinant proteins on customized protein microarrays. A microarray was composed of 16 rows and 20 columns, each protein was repeatedly coated on two adjacent locations in the same row, so were the control probes. No duplicate proteins were listed in the above arrangement.

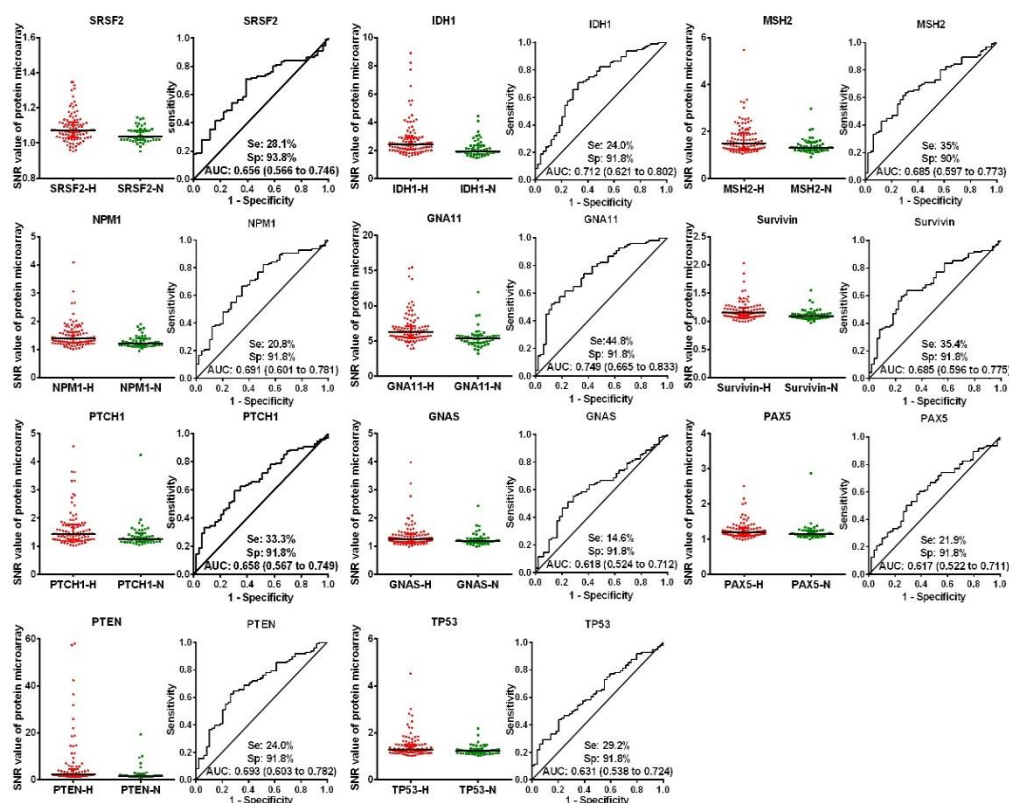

**Figure S2.** Scatter plots and ROC curves of autoantibodies against 11 selected TAAs from protein microarray. For each autoantibody against TAA, scatter plots of SNR value of protein microarray are on the left, while ROC curves are on the right. H, hepatocellular carcinoma; N, normal control; Se, sensitivity; Sp, specificity; AUC, area under the receiver operating characteristic curve, and 95% CI of AUC in brackets. The lines on scatter plots are median with interquartile range.

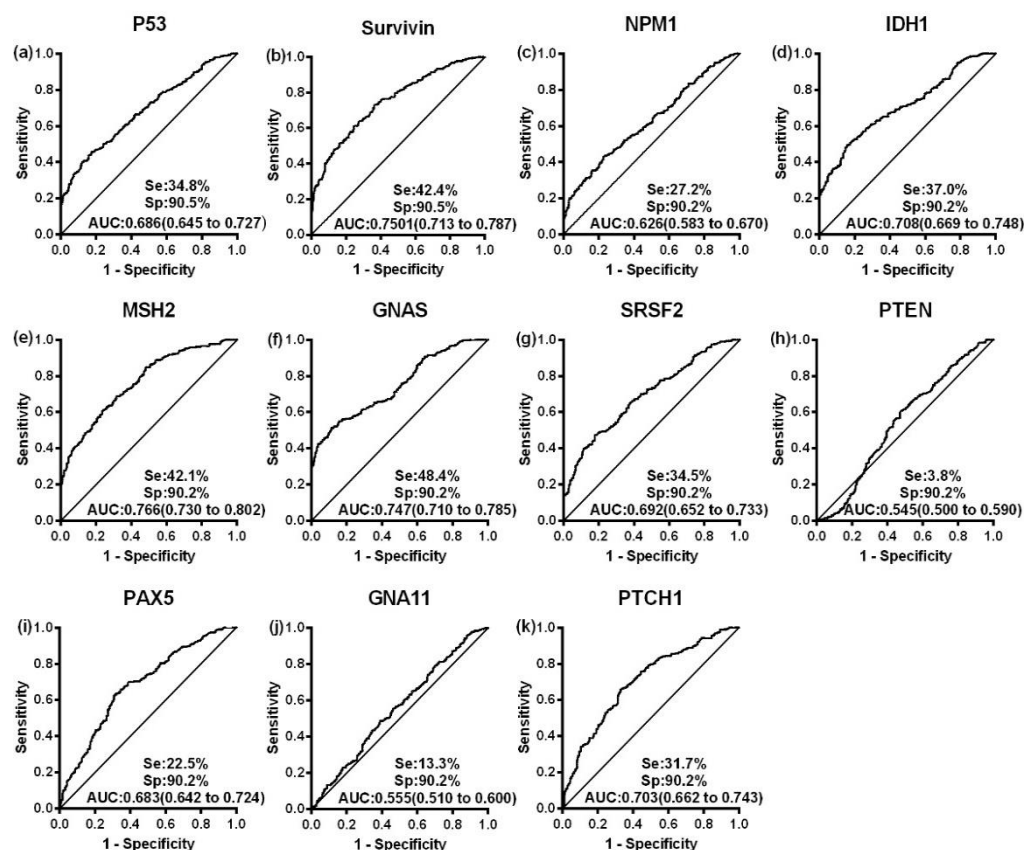

**Figure S3.** ROC curves of single anti-TAA autoantibody in training dataset. Se, sensitivity; Sp, specificity; AUC, area under the receiver operating characteristic curve, and 95% CI of AUC in brackets.

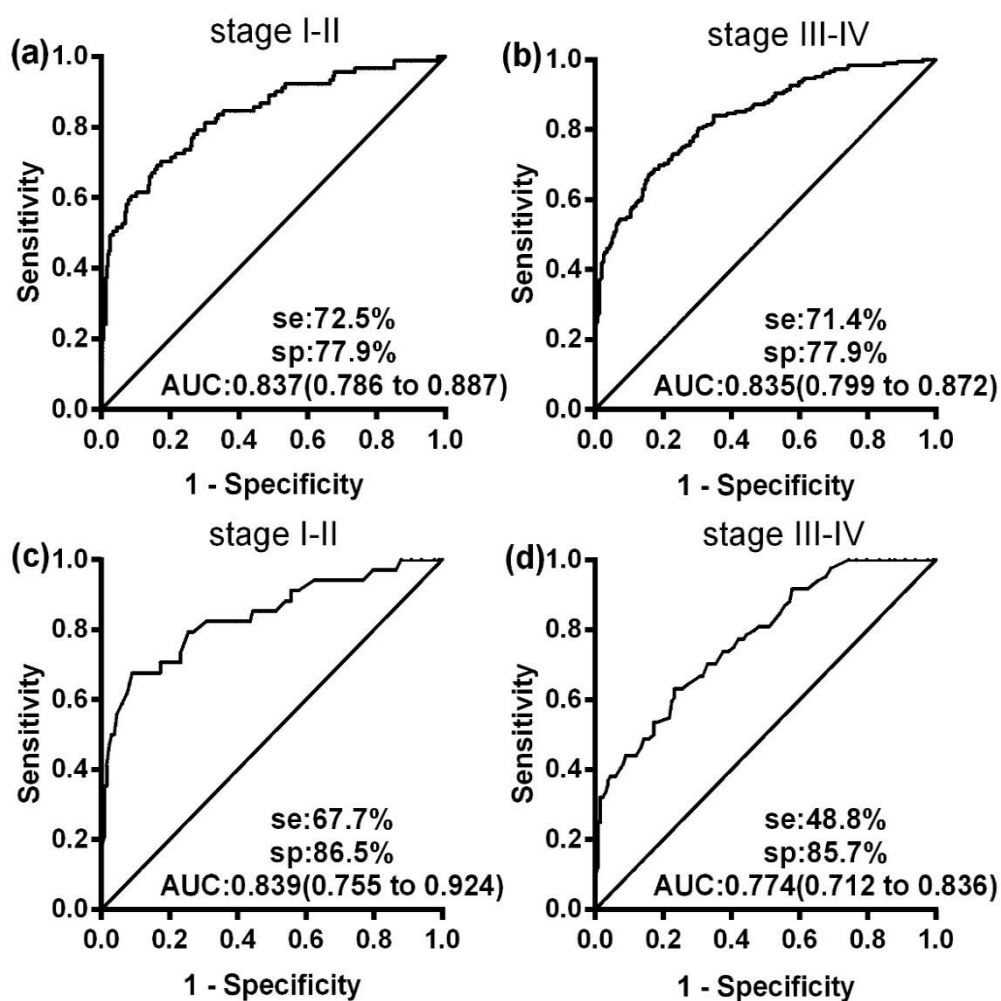

**Figure S4.** ROC curves of prediction probability value in early stage and late stage of training dataset (a,b) and validation dataset (c,d). Se, sensitivity; Sp, specificity; AUC, area under the receiver operating characteristic curve, and 95% CI of AUC in brackets.

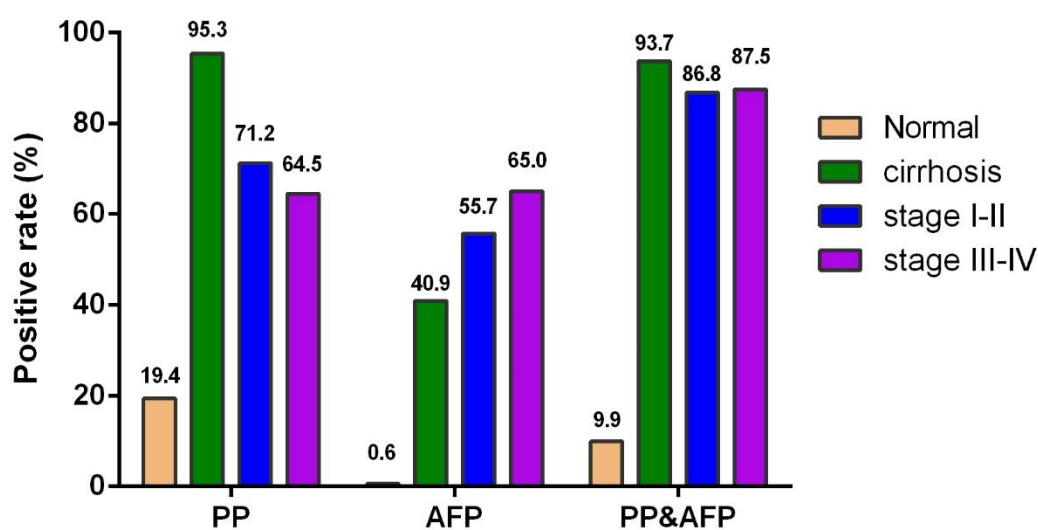

**Figure S5.** Positive rate of PP, AFP and PP&AFP in NC, cirrhosis, stage I-II HCC patients and stage III-IV HCC patients. PP, prediction probability; PP&AFP, PP and AFP value combined by logistic regression.

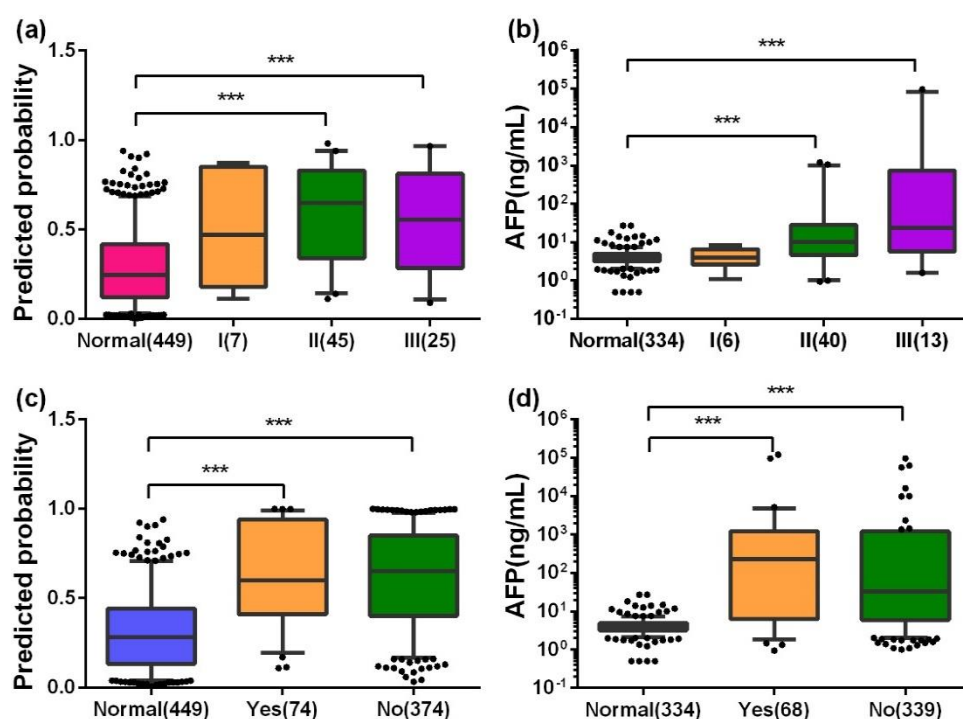

**Figure S6.** Box plots of PP value and AFP in different histological grades (a,b) and metastasis (c,d) of HCC. “I, II, III” indicate the grade of pathological differentiation “high, moderate, low”. “Yes” and “No” represent “with metastasis” and “without metastasis” respectively. \*\*\*  $P < 0.001$ . Lines on boxes are in the order of 95, 75, 50, 25 and 5 quantiles from top to bottom. Whiskers indicate points greater than 95% quantile and less than 5% quantile.

**Table S1.** positive rate in different stage of different datasets

|                    |        | Positive Rate     | $\chi^2 / P$  |
|--------------------|--------|-------------------|---------------|
| training dataset   | I-II   | 72.5% (66 / 91)   | 0.645 / 0.493 |
|                    | III-IV | 71.4% (135 / 189) |               |
| validation dataset | I-II   | 67.7% (23 / 34)   | 3.460 / 0.070 |
|                    | III-IV | 48.8% (41 / 84)   |               |

**Table S2.** positive rate in AFP (+) and AFP (-) group of different datasets

|                    |         | Positive Rate     | $\chi^2 / P$ |
|--------------------|---------|-------------------|--------------|
| training dataset   | AFP (+) | 74.5% (120 / 161) | 1.727/0.221  |
|                    | AFP (-) | 67.3% (76 / 113)  |              |
| validation dataset | AFP (+) | 51.3% (39 / 76)   | 0.003/1.000  |
|                    | AFP (-) | 50.9% (29 / 57)   |              |

**Table S3.** Descriptions/functions of the 11 TAAs

| TAAs            | Gene Name                                                                                                                                                                             | Classification | Core Pathway                               | Process                   |
|-----------------|---------------------------------------------------------------------------------------------------------------------------------------------------------------------------------------|----------------|--------------------------------------------|---------------------------|
| GNA11           | Guanine nucleotide-binding protein subunit alpha-11                                                                                                                                   | Oncogene       | PI3K; RAS; MAPK                            | Cell Survival             |
| MSH2            | mutS homolog 2                                                                                                                                                                        | TSG            | DNA Damage Control                         | Genome Maintenance        |
| GNAS            | GNAS complex locus                                                                                                                                                                    | Oncogene       | APC; PI3K; TGF- $\beta$ , RAS              | Cell Survival / Cell Fate |
| PTCH1           | patched homolog 1                                                                                                                                                                     | TSG            | HH                                         | Cell Fate                 |
| IDH1            | isocitrate dehydrogenase 1 (NADP+), soluble                                                                                                                                           | Oncogene       | Chromatin Modification                     | Cell Fate                 |
| SRSF2           | SRSF2 serine/arginine-rich splicing factor 2                                                                                                                                          | Oncogene       | Transcriptional Regulation                 | Cell Fate                 |
| PAX5            | paired box 5                                                                                                                                                                          | TSG            | Chromatin Modification                     | Cell Fate                 |
| Survivin / IAP4 | BIRC5                                                                                                                                                                                 | -----          | Inhibitor of apoptosis                     | Apoptosis                 |
| NPM1            | nucleophosmin 1 (nucleolar phosphoprotein B23, numatrin) pseudogene 21; hypothetical LOC100131044; similar to nucleophosmin 1; nucleophosmin (nucleolar phosphoprotein B23, numatrin) | TSG            | Cell Cycle / Apoptosis                     | Cell Survival             |
| TP53            | tumor protein p53                                                                                                                                                                     | TSG            | Cell Cycle / Apoptosis; DNA Damage Control | Cell Survival             |
| PTEN            | Phosphatidylinositol 3,4,5-trisphosphate 3-phosphatase and dual-specificity protein phosphatase                                                                                       | TSG            | PI3K                                       | Cell Survival             |

TSG: tumor suppressor gene.
